# Supplementary material for: Peptide turns through just ‘one atom’! A sulfamide group nucleates folding and stabilizes new supramolecular topologies in short peptides
Source: Royal Society of Chemistry journal article supplement (doi:10.1039/c4ce01938e), 2014-01-01
Supplement: c4ce01938e1.pdf [file c4ce01938e1.pdf]

*Supporting information*

## **Peptide Turns Through Just ‘One Atom’! Sulfamide Group Nucleates Folding and Stabilizes New Supramolecular Topologies in Short Peptides**

Pushparathinam Gopinath, Venkatachalam Ramkumar and Kannoth Manheri Muraleedharan \*  
Department of Chemistry, Indian Institute of Technology Madras, Chennai, 600 036 – INDIA

---

| <b>Table of Contents</b>                                                           | <b>Pages</b> |
|------------------------------------------------------------------------------------|--------------|
| 1. Crystallographic summary for compounds <b>1a-d</b>                              | 2            |
| 2. Details of secondary interactions in the crystal structures of <b>1a-d</b>      | 3-5          |
| 3. Arrangement of hydrophobic side chains in the lattices of <b>1b</b> & <b>1c</b> | 6            |
| 4. Arrangement of molecules in the lattice of <b>1d</b> along a axis               | 6            |
| 5. Synthetic sequence used to prepare sulfamido peptides <b>1a-1d</b>              | 7            |
| 6. Experimental procedures, spectral- and analytical data                          | 7-10         |
| 7. <sup>1</sup> H and <sup>13</sup> C NMR spectra of compound <b>2a</b>            | 11           |
| 8. <sup>1</sup> H and <sup>13</sup> C NMR spectra of compound <b>2b</b>            | 12           |
| 9. <sup>1</sup> H and <sup>13</sup> C NMR spectra of compound <b>2c</b>            | 13           |
| 10. <sup>1</sup> H and <sup>13</sup> C NMR spectra of compound <b>1a</b>           | 14           |
| 11. <sup>1</sup> H and <sup>13</sup> C NMR spectra of compound <b>1b</b>           | 15           |
| 12. <sup>1</sup> H and <sup>13</sup> C NMR spectra of compound <b>1c</b>           | 16           |
| 13. <sup>1</sup> H and <sup>13</sup> C NMR spectra of compound <b>1d</b>           | 17           |

**Table 1.** Crystallographic summary for compounds **1a-1d**

| <b>Compounds</b>        | <b>1a</b>                                                      | <b>1b</b>                                                       | <b>1c</b>                                                       | <b>1d</b>                                                       |
|-------------------------|----------------------------------------------------------------|-----------------------------------------------------------------|-----------------------------------------------------------------|-----------------------------------------------------------------|
| Chemical formula        | C <sub>22</sub> H <sub>4</sub> N <sub>4</sub> O <sub>8</sub> S | C <sub>24</sub> H <sub>46</sub> N <sub>4</sub> O <sub>8</sub> S | C <sub>26</sub> H <sub>50</sub> N <sub>4</sub> O <sub>8</sub> S | C <sub>14</sub> H <sub>26</sub> N <sub>4</sub> O <sub>8</sub> S |
| Formula weight          | 522.67                                                         | 550.71                                                          | 578.76                                                          | 410.45                                                          |
| Crystal system          | Orthorhombic                                                   | Orthorhombic                                                    | Orthorhombic                                                    | Triclinic                                                       |
| a (Å)                   | 15.675(2)                                                      | 9.1689(4)                                                       | 10.551(3)                                                       | 4.9125(2)                                                       |
| B (Å)                   | 18.849(5)                                                      | 15.8240(5)                                                      | 15.765(5)                                                       | 9.3729(4)                                                       |
| C (Å)                   | 19.855(5)                                                      | 21.6607(10)                                                     | 20.395(5)                                                       | 12.3508(5)                                                      |
| α (°)                   | 90                                                             | 90                                                              | 90                                                              | 110.316(2)                                                      |
| β (°)                   | 90                                                             | 90                                                              | 90                                                              | 90.313(2)                                                       |
| γ (°)                   | 90                                                             | 90                                                              | 90                                                              | 100.2330(10)                                                    |
| Temperature             | 298(2) K                                                       | 273(2) K                                                        | 298(2) K                                                        | 298(2) K                                                        |
| V (Å <sup>3</sup> )     | 5867(2)                                                        | 3142.7(2)                                                       | 3392.4(16)                                                      | 523.43(4)                                                       |
| Space group (No)        | P2(1)2(1)2(1)                                                  | P2(1)2(1)2(1)                                                   | P2(1)2(1)2(1)                                                   | P1                                                              |
| Z                       | 4                                                              | 4                                                               | 4                                                               | 1                                                               |
| Total reflections       | 7962                                                           | 11534                                                           | 5719                                                            | 7806                                                            |
| Independent reflections | 3199                                                           | 6066                                                            | 2538                                                            | 4364                                                            |
| Final R value           | 0.0496                                                         | 0.0743                                                          | 0.0536                                                          | 0.0371                                                          |
| CCDC Number             | 980490                                                         | 980491                                                          | 980493                                                          | 1009176                                                         |

## Details of secondary interactions in the crystal structures of 1a-d

### I. Dival sulfamide 1a

Table 2. Important hydrogen bond lengths and angles in the assembly of isomorphs I and II

| Bonds          | Atoms involved                        | Bond length(Å) | Bond angle (degrees) |
|----------------|---------------------------------------|----------------|----------------------|
| 1 <sup>a</sup> | N <sub>2</sub> 'H ... O <sub>1</sub>  | 2.249          | 147.84               |
| 2              | N <sub>1</sub> H...O <sub>3</sub> '   | 2.664          | 132.12               |
| 3              | N <sub>1</sub> 'H...O <sub>2</sub> '  | 2.440          | 133.01               |
| 4              | C <sub>2</sub> 'H...O <sub>1</sub> =S | 2.638          | 152.98               |
| 5              | C <sub>1</sub> H...O <sub>1</sub> '   | 2.529          | 135.29               |
| 6              | N <sub>2</sub> H ... O <sub>1</sub> ' | 2.113          | 153.75               |
| 7 <sup>b</sup> | C <sub>2β</sub> H...O <sub>2</sub> =S | 2.553          | 150.61               |

<sup>a</sup> For isomorph II, the N<sub>2</sub>'H ... O<sub>1</sub> bond length is 2.225 Å and the angle is 148°;

<sup>b</sup> C<sub>2β</sub>H represent the hydrogen atom of the methyl group of second Valine residue

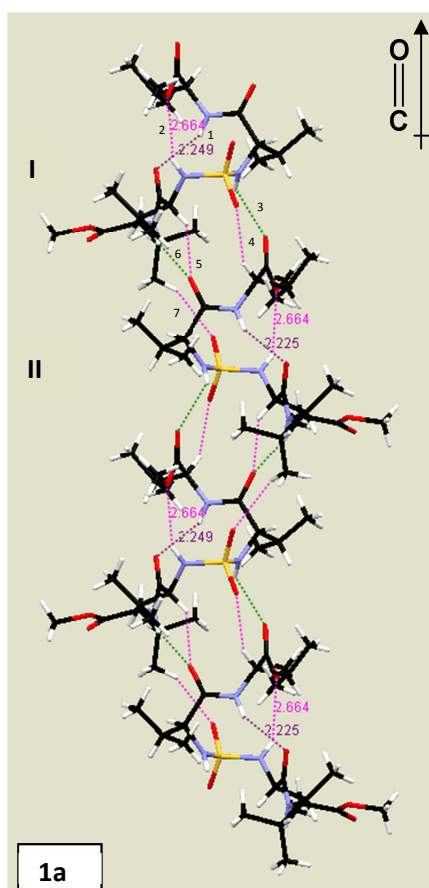

Distances between C $\alpha$  carbons at 1,1'- and 2,2' positions

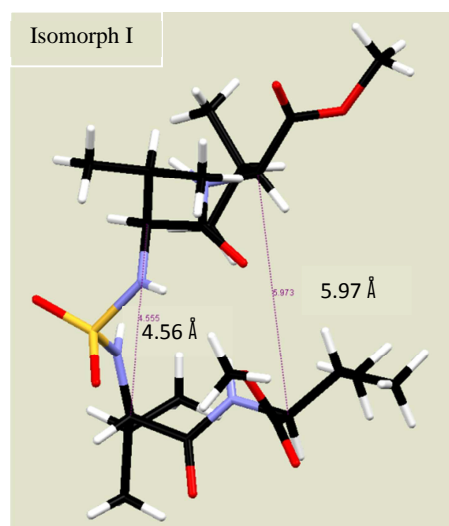

## II. Dilleu sulfamide 1b

Table 2. Important secondary interactions which stabilize the lattice of 1b

| Bonds | Atoms involved                        | Bond length | Bond angle (degrees) |
|-------|---------------------------------------|-------------|----------------------|
| 1     | N <sub>2</sub> 'H...O <sub>1</sub>    | 2.083       | 158.12               |
| 2     | N <sub>1</sub> H...O <sub>3</sub> '   | 2.602       | 134.73               |
| 3     | C <sub>2</sub> 'H...O <sub>1</sub> =S | 2.666       | 155.37               |
| 4     | N <sub>1</sub> 'H...O <sub>2</sub> '  | 2.297       | 133.47               |
| 5     | C <sub>1</sub> H...O <sub>1</sub> '   | 2.563       | 133.39               |
| 6     | N <sub>2</sub> H...O <sub>1</sub> '   | 2.030       | 163.63               |

C<sub>2</sub>'H represents the hydrogen atom attached to the CH<sub>3</sub> group of the second Ileu residue

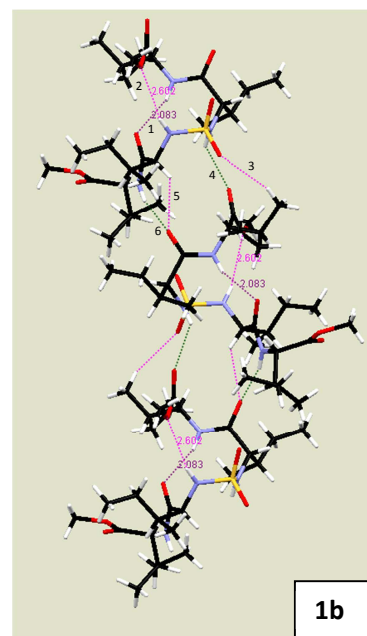

## III. ValLeu sulfamide 1c

Table 3. Important secondary interactions which stabilize the lattice of 1c

| Bonds | Atoms involved                         | Bond length | Bond angle (degrees) |
|-------|----------------------------------------|-------------|----------------------|
| 1     | N <sub>2</sub> 'H...O <sub>1</sub>     | 2.113       | 156.95               |
| 2     | N <sub>1</sub> H...O <sub>3</sub> '    | 2.540       | 132.38               |
| 3     | C <sub>2δ</sub> 'H...O <sub>1</sub> =S | 2.699       | 122.42               |
| 4     | C <sub>2</sub> 'H...O <sub>1</sub> =S  | 2.652       | 137.89               |
| 5     | N <sub>1</sub> 'H...O <sub>2</sub> '   | 2.330       | 132.82               |
| 6     | C <sub>1</sub> H...O <sub>1</sub> '    | 2.613       | 134.41               |
| 7     | N <sub>2</sub> H...O <sub>1</sub> '    | 2.024       | 170.28               |

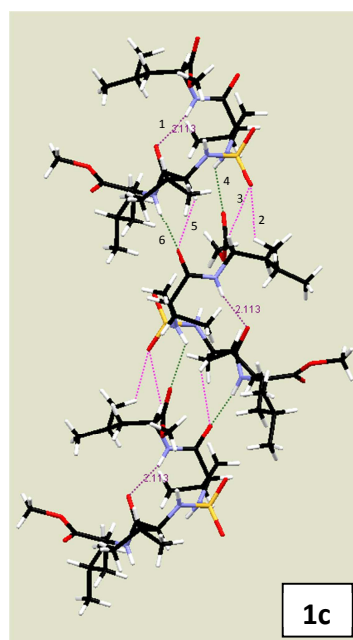

#### IV Diala sulfamide 1d

Table 4. Important secondary interactions which stabilize the lattice of 1d

| Bonds | Atoms involved             | Bond length | Bond angle (degrees) |
|-------|----------------------------|-------------|----------------------|
| 1     | $N_1H \cdots O_1=S$        | 2.072       | 153.50               |
| 2     | $C_1H \cdots O_1$          | 2.591       | 148.57               |
| 3     | $N_2H \cdots O_1$          | 2.120       | 172.87               |
| 4     | $N_2'H \cdots O_1'$        | 2.084       | 176.15               |
| 5     | $C_{2\beta}'H \cdots O_3'$ | 2.564       | 156.09               |

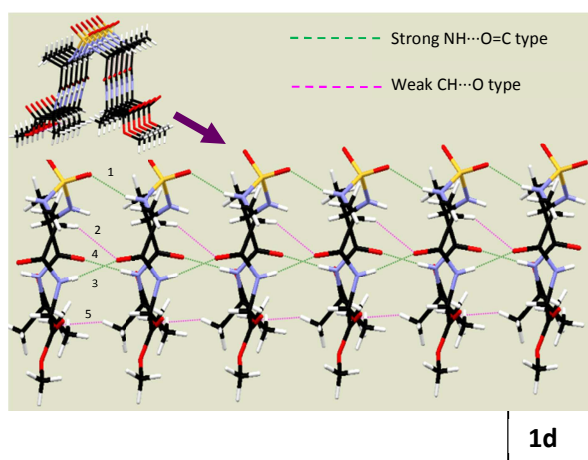

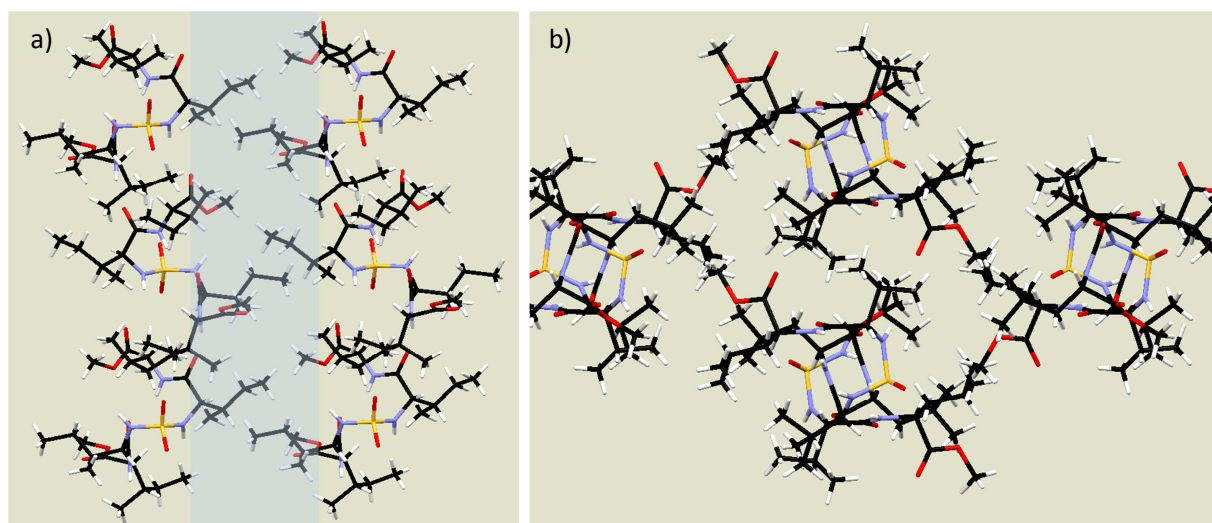

Figure 1. a) Arrangement of hydrophobic side chains in-between the helical stacks of **1b**; b) shows the clustering of side chains in between the helical assemblies of **1c**.

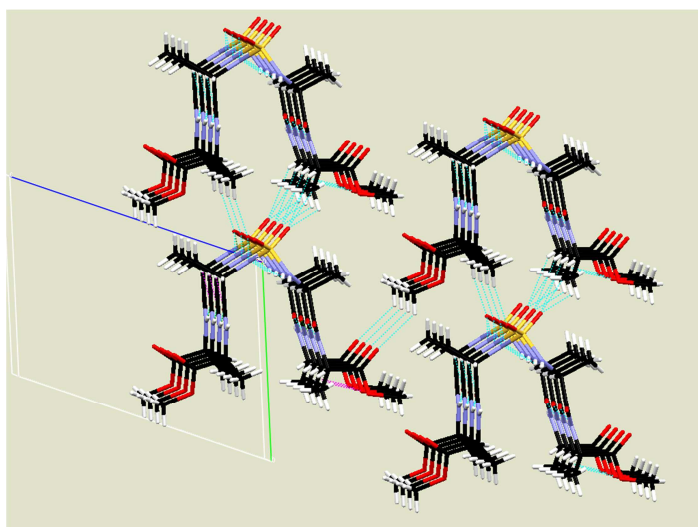

Figure 2. Arrangement of molecules in the lattice of **1d** along **a** axis

**Scheme 1: Synthetic sequence used to prepare sulfamido peptides 1a-1d**

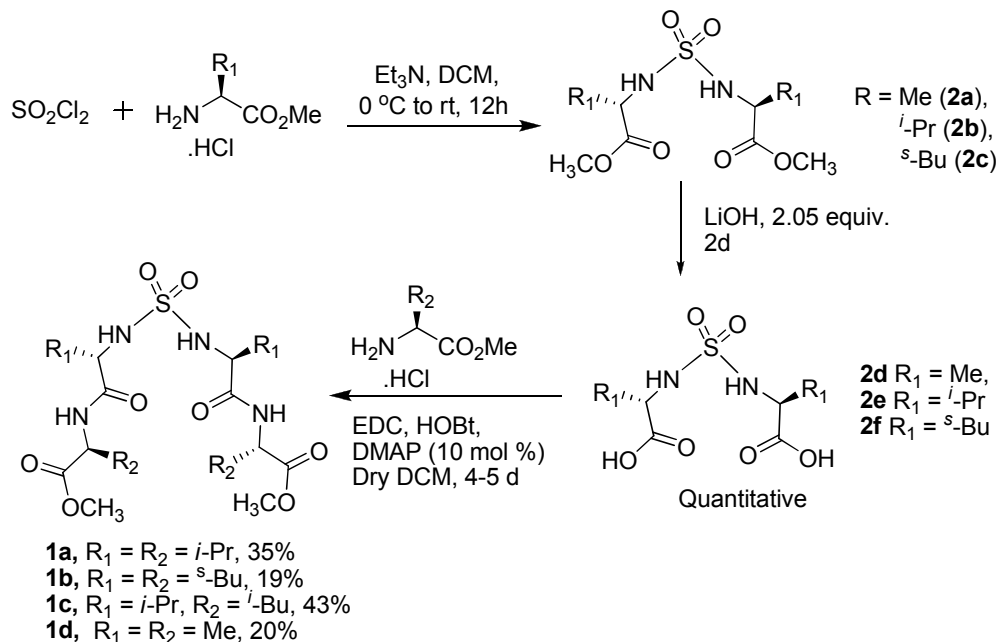

**General procedure for the syntheses of compounds 2a-2c**

These starting materials (**2a-2c**) were synthesized as per the literature protocol (Dougherty *et al.*, Tetrahedron 2000, **56**, 9781).

To a stirred solution of the amino acid methyl ester hydrochloride (1 equiv.) in dry DCM at 0 °C, in a two necked RB flask under nitrogen atmosphere was added triethylamine (2-3 equiv.). A dilute solution of sulfuryl chloride (0.45-0.5 equiv.) in dry DCM (40-80 mL) was then added drop-wise to this using an addition funnel during about 30-45 min, the mixture was allowed to warm to room temperature and stirring was continued for an additional 12 h. The reaction mixture was washed with water and 5% HCl solution, extracted with DCM, dried over  $\text{Na}_2\text{SO}_4$  and solvents were evaporated to get a residue which was chromatographed using EtOAc-Hexanes mixture to get the compounds **2a-2d** in 20-65% yields as white crystalline solids.

**N,N'-Sulfonyl bis-L-alanine dimethyl ester (2a)**

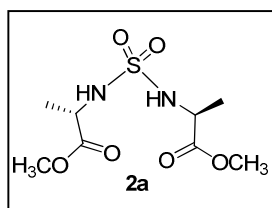

L-alanine methyl ester hydrochloride (11 g, 78.8 mmol) on reaction with sulfuryl chloride (3.19 mL, 39.4 mmol) in Et<sub>3</sub>N (22 mL, 157.6 mmol) according to the general procedure given above for 12 h, gave **2a** (2.05 g, 20% yield) as white crystalline solid. Analytical data for **2a**: R<sub>f</sub>: 0.6 (40% EtOAc-Hexanes); mp 86-88 °C; <sup>1</sup>H NMR (CDCl<sub>3</sub>) δ 5.25 (d, 1H, *J* = 8.4 Hz), 4.10 (dq, 1H, *J* = 7.6, 7.6 Hz), 3.76 (s, 3H), 1.45 (d, 3H, *J* = 7.2 Hz); <sup>13</sup>C NMR (CDCl<sub>3</sub>) δ 173.7, 52.7, 51.8, 19.2; IR (neat) cm<sup>-1</sup>: 3270, 2962, 1739, 1453, 1349; HRMS (ESI) exact mass calcd. for C<sub>8</sub>H<sub>17</sub>N<sub>2</sub>O<sub>6</sub>S [M+H]<sup>+</sup> 269.0807, found [M+H]<sup>+</sup> 269.0810.

#### N,N'-Sulfonyl bis-L-valine dimethyl ester (**2b**)

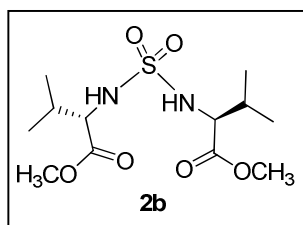

L-Valine methyl ester hydrochloride (5 g, 29.85 mmol) on reaction with sulfuryl chloride (1.2 mL, 14.92 mmol) in Et<sub>3</sub>N (12.5 mL, 89.55 mmol) according to the general procedure given above for 12 h, gave **2b** (3.1 g, 65% yield) as white crystalline solid. Analytical data for **2b**: R<sub>f</sub>: 0.6 (20% EtOAc-Hexanes); mp 73-74 °C; <sup>1</sup>H NMR (CDCl<sub>3</sub>) δ 5.22 (bs, 1H), 3.89 (dd, 1H, *J* = 9.6, 4.4 Hz), 3.77 (s, 3H), 2.18-2.08 (m, 1H), 1.0 (d, 3H, *J* = 6.8 Hz), 0.89 (d, 3H, *J* = 6.8 Hz); <sup>13</sup>C NMR (CDCl<sub>3</sub>) δ 172.8, 61.1, 52.3, 31.4, 18.7, 17.4; [α]<sub>D</sub><sup>20</sup> -26.32 (c = 0.1, CH<sub>3</sub>OH); IR (neat) cm<sup>-1</sup>: 3466, 3316, 2971, 1742, 1466, 1392, 1357; HRMS (ESI) exact mass calcd. for C<sub>12</sub>H<sub>25</sub>N<sub>2</sub>O<sub>6</sub>S [M+H]<sup>+</sup> 325.1433, found [M+H]<sup>+</sup> 325.1433.

#### N,N'-Sulfonyl bis-L-isoleucine dimethyl ester (**2c**)

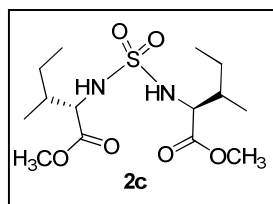

L-Isoleucine methyl ester hydrochloride (2 g, 11 mmol) on reaction with sulfuryl chloride (0.89 mL, 4.95 mmol) in Et<sub>3</sub>N (4.69 mL, 33 mmol) according to the general procedure given above for 12 h, gave **2c** (0.9 g, 23% yield) as a white crystalline solid. Analytical data for **2c**: R<sub>f</sub>: 0.6 (30% EtOAc-Hexanes); mp 55-56 °C; <sup>1</sup>H NMR (CDCl<sub>3</sub>) δ 5.08 (d, 1H, *J* = 9.6 Hz), 3.92 (dd, 1H, *J* = 4.4, 4.4 Hz), 3.75 (s, 3H), 1.89-1.83 (m, 1H), 1.44-1.35 (m, 1H), 1.22-1.11 (m, 1H), 0.96-0.70 (m, 6H); <sup>13</sup>C NMR (CDCl<sub>3</sub>) δ 172.82, 60.42, 52.35, 38.4, 24.9, 15.3, 11.6; [α]<sub>D</sub><sup>20</sup> -30.32 (c = 0.1, CH<sub>3</sub>OH); IR (neat) cm<sup>-1</sup>: 3312, 2966, 1733, 1456, 1361, 1300; HRMS (ESI) exact mass calcd. for C<sub>14</sub>H<sub>29</sub>N<sub>2</sub>O<sub>6</sub>S [M+H]<sup>+</sup> 353.1746, found [M+H]<sup>+</sup> 353.1747.



## General procedure for the synthesis of sulfamido-peptides **1a-1d**

At first, the diesters **2a-c** were subjected to alkaline hydrolysis (1N LiOH in 3:1 of THF and water) to get the corresponding diacids **2d-f** in quantitative yields. To a stirred solution of the diacid (1 equiv.) in dry DCM at 0 °C was added EDCI (3 equiv.), HOBt (1 equiv.), DMAP (10 mol %) and DIPEA (10 equiv.) followed by the appropriate amino acid methyl ester hydrochloride salt (10 equiv.). The mixture was allowed to stir at room temperature for 4-5 days, diluted with DCM, washed with water and 5 % HCl solution, and the residue after solvent evaporation was chromatographed with EtOAc/Hexanes to afford the desired sulfamido-peptides in moderate to good yields.

### Sulfamido peptide **1a**

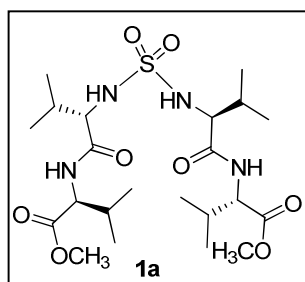

Diacid **2e** (0.4 g, 1.35 mmol) on reaction with L-valine methyl ester hydrochloride (2.26 g, 13.5 mmol) under the standard peptide coupling protocol discussed above for **4d** afforded the product **1a** (0.26 g, 35% yield). Analytical data for **1a**:  $R_f$ : 0.5 (75% EtOAc-Hexanes); <sup>1</sup>H NMR (CDCl<sub>3</sub>): δ 7.06 (d, 1H,  $J$  = 8.8 Hz), 5.48 (d, 1H,  $J$  = 7.6 Hz), 4.6 (dd, 1H,  $J$  = 5.2, 5.2 Hz), 3.89 (dd, 1H,  $J$  = 6.0, 5.6 Hz), 3.76 (s, 3H), 2.28-2.19 (m, 1H), 2.18-1.9 (m, 1H), 1.03 (d, 3H,  $J$  = 6.8 Hz), 0.99-0.92 (m, 9H); <sup>13</sup>C NMR (CDCl<sub>3</sub>) δ 172.9, 171.6, 63.6, 57.4, 52.3, 31.0, 30.9, 19.2, 19.1, 17.9 (2C); HRMS (ESI) exact mass calcd. for C<sub>22</sub>H<sub>42</sub>N<sub>4</sub>O<sub>8</sub>SNa [M+Na]<sup>+</sup> 545.2621, found [M+Na]<sup>+</sup> 545.2618.

### Sulfamido peptide **1b**

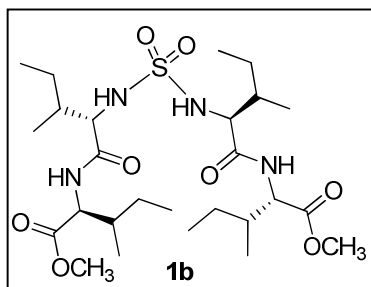

Diacid **2f** (1.0 g, 3.086 mmol) on reaction with L-Isoleucine methyl ester hydrochloride (5.6 g, 30.86 mmol) under the standard peptide coupling protocol discussed above for **4d** afforded the product **1b** (0.355 g, 19% yield) as colourless solid. Analytical data for **1b**:  $R_f$ : 0.15 (90% EtOAc-Hexanes); mp 123-124 °C; <sup>1</sup>H NMR (CDCl<sub>3</sub>): δ 7.08 (d, 1H,  $J$  = 8 Hz), 5.46 (d, 1H,  $J$  = 7.2 Hz), 4.62 (dd, 1H,  $J$  = 6.8, 6.0 Hz), 3.91 (dd, 1H,  $J$  = 6.4, 5.6 Hz), 3.74 (s, 3H), 2.0-1.92 (m, 1H), 1.9-1.8 (m, 1H), 1.6-1.52 (m, 1H), 1.49-1.4 (m, 1H), 1.27-1.2 (m, 2H), 1.0-0.85 (m, 12H); <sup>13</sup>C NMR (CDCl<sub>3</sub>): δ 172.9, 171.4, 62.9, 56.7, 52.2, 37.7, 37.5, 25.3, 25.2, 24.9, 15.6,

15.5, 11.4;  $[\alpha]_D^{20}$  -62.56 ( $c = 0.13$ ,  $\text{CH}_3\text{OH}$ ); IR (neat)  $\text{cm}^{-1}$ : 3299, 3259, 2957, 2880, 1746, 1731, 1652, 1553; ESI  $m/z$ : calcd. for  $\text{C}_{26}\text{H}_{50}\text{N}_4\text{O}_8\text{SNa}$   $[\text{M}+\text{Na}]^+$  601.3276, found  $[\text{M}+\text{Na}]^+$  601.3247.

### Sulfamido peptide 1c

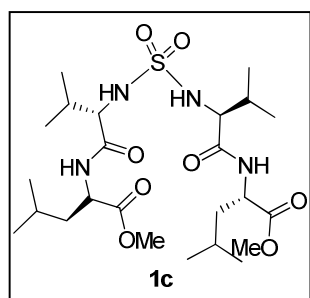

Diacid **2e** (0.4 g, 1.351 mmol) on reaction with L-Leucine methyl ester hydrochloride (2.45 g, 13.5 mmol) under the standard peptide coupling protocol discussed above for 4d afforded the product **1c** (0.32 g, 43% yield). Analytical data for **1c**:  $R_f$ : 0.4 (90% EtOAc-Hexanes); mp 163-164 °C;  $^1\text{H}$  NMR ( $\text{CDCl}_3$ ):  $\delta$  7.45 (d, 1H,  $J = 6.4$  Hz), 5.72 (d, 1H,  $J = 5.6$  Hz), 4.66-4.62 (m, 1H), 3.89 (dd, (1H,  $J = 5.6, 4.8$  Hz), 3.73 (s, 3H), 2.1-2.04 (m, 1H), 1.78-1.63 (m, 3H), 1.02 (d, 3H,  $J = 5.2$  Hz), 0.98-0.93 (m, 9H);  $^{13}\text{C}$  NMR ( $\text{CDCl}_3$ ):  $\delta$  174.1, 171.8, 64.3, 52.4, 50.9, 40.5, 31.0, 24.9, 22.9, 21.4, 19.2, 18.1;  $[\alpha]_D^{20}$  -43.76 ( $c = 0.1$ ,  $\text{CH}_3\text{OH}$ ); IR (neat)  $\text{cm}^{-1}$ : 3284, 3261, 3079, 2875, 1751, 1730, 1647, 1558, 1462; ESI  $m/z$ : calcd. for  $\text{C}_{24}\text{H}_{47}\text{N}_4\text{O}_8\text{S}$   $[\text{M}+\text{H}]^+$  551.3115 found  $[\text{M}+\text{H}]^+$  551.3132.

### Sulfamido peptide 1d

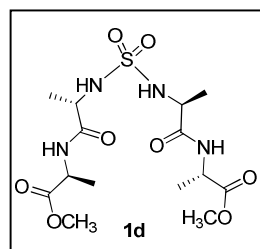

Diacid **2d** (0.32 g, 1.3 mmol) on reaction with L-alanine methyl ester hydrochloride (1.85 g, 13 mmol) under the standard peptide coupling protocol discussed above for 4 d to afforded the product **1d** (0.11 g, 20% yield). Analytical data for **1d**:  $R_f$ : 0.4 (75% EtOAc-Hexanes); mp 152-153 °C;  $^1\text{H}$  NMR ( $\text{CDCl}_3$ ):  $\delta$  7.45 (d, 1H,  $J = 5.6$  Hz), 6.7 (d, 1H,  $J = 6.8$  Hz), 4.57 (m, 2H), 3.76 (s, 3H), 1.49 (d, 3H,  $J = 6.8$  Hz), 1.44 (d, 3H,  $J = 7.2$  Hz);  $^{13}\text{C}$  NMR ( $\text{CDCl}_3$ ):  $\delta$  172.9, 170.2, 52.6, 49.1, 48.3, 18.6, 18.1;  $[\alpha]_D^{20}$  -154.96 ( $c = 0.1$ ,  $\text{CH}_3\text{OH}$ ); IR (neat)  $\text{cm}^{-1}$ : 3315, 3292, 3263, 3241, 2958, 1746, 1660, 1552, 1454, 1346; ESI  $m/z$ : calcd. for  $\text{C}_{14}\text{H}_{27}\text{N}_4\text{O}_8\text{S}$   $[\text{M}+\text{H}]^+$  411.1564, found  $[\text{M}+\text{H}]^+$  411.1550.

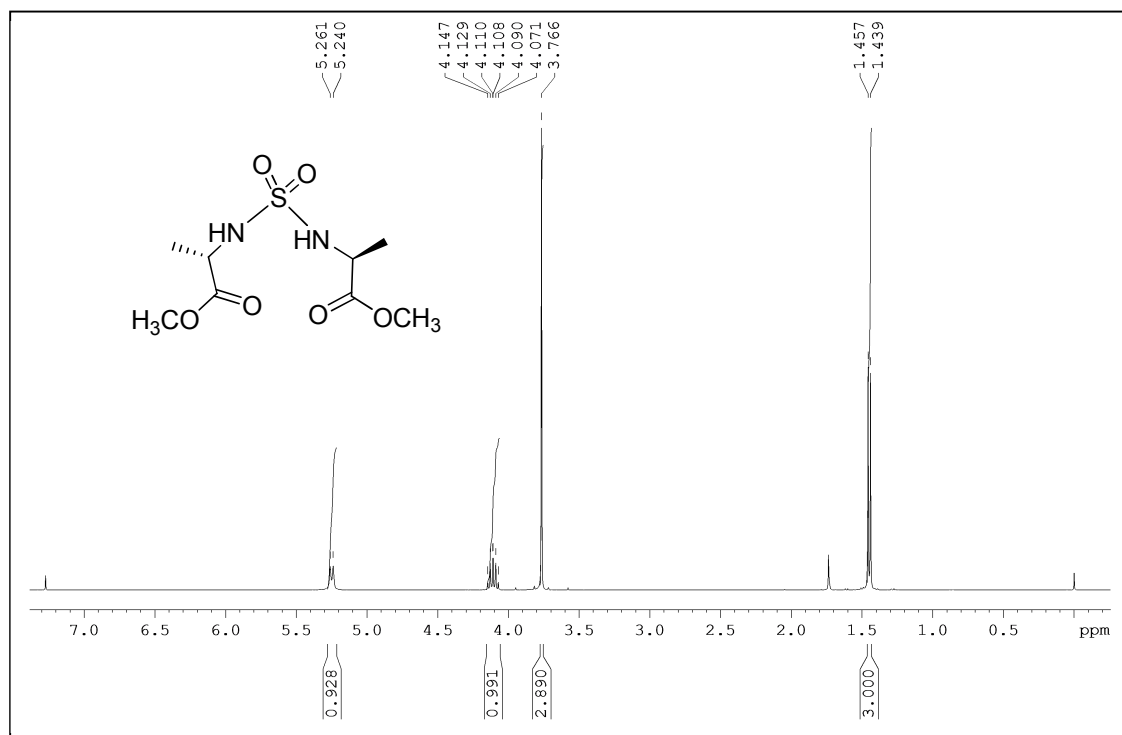

Figure 3. <sup>1</sup>H NMR (400 MHz) spectrum of compound 2a

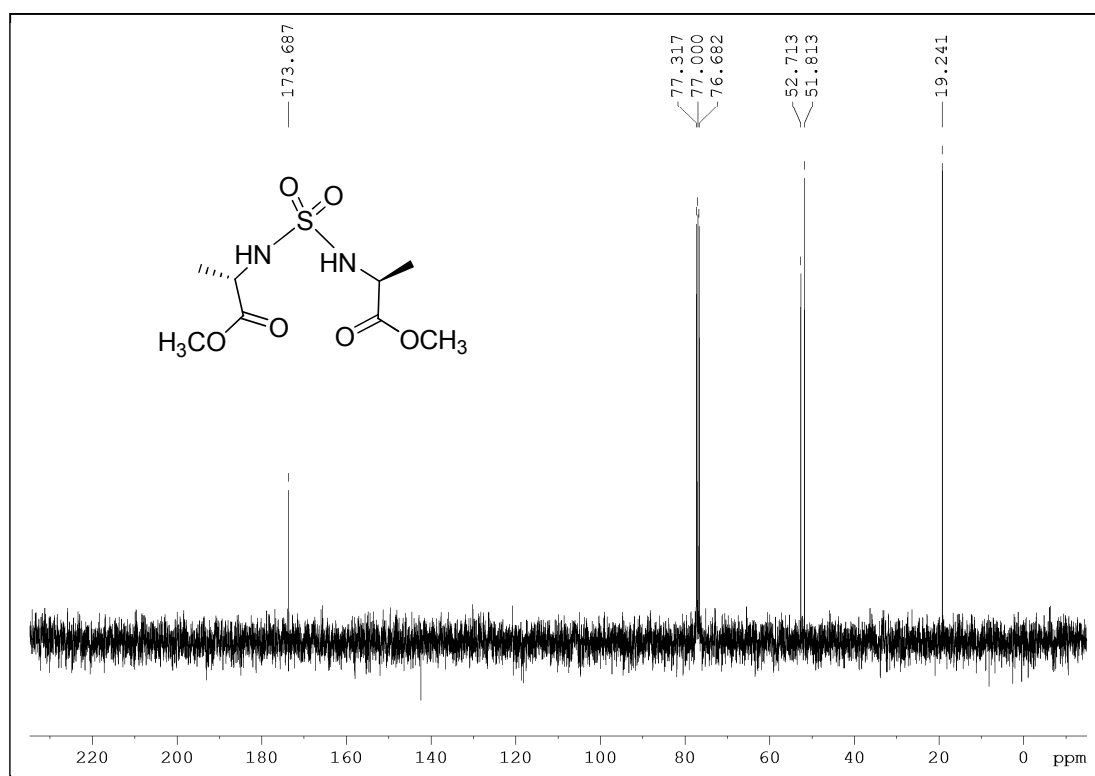

Figure 4. <sup>13</sup>C NMR (100 MHz) spectrum of compound 2a

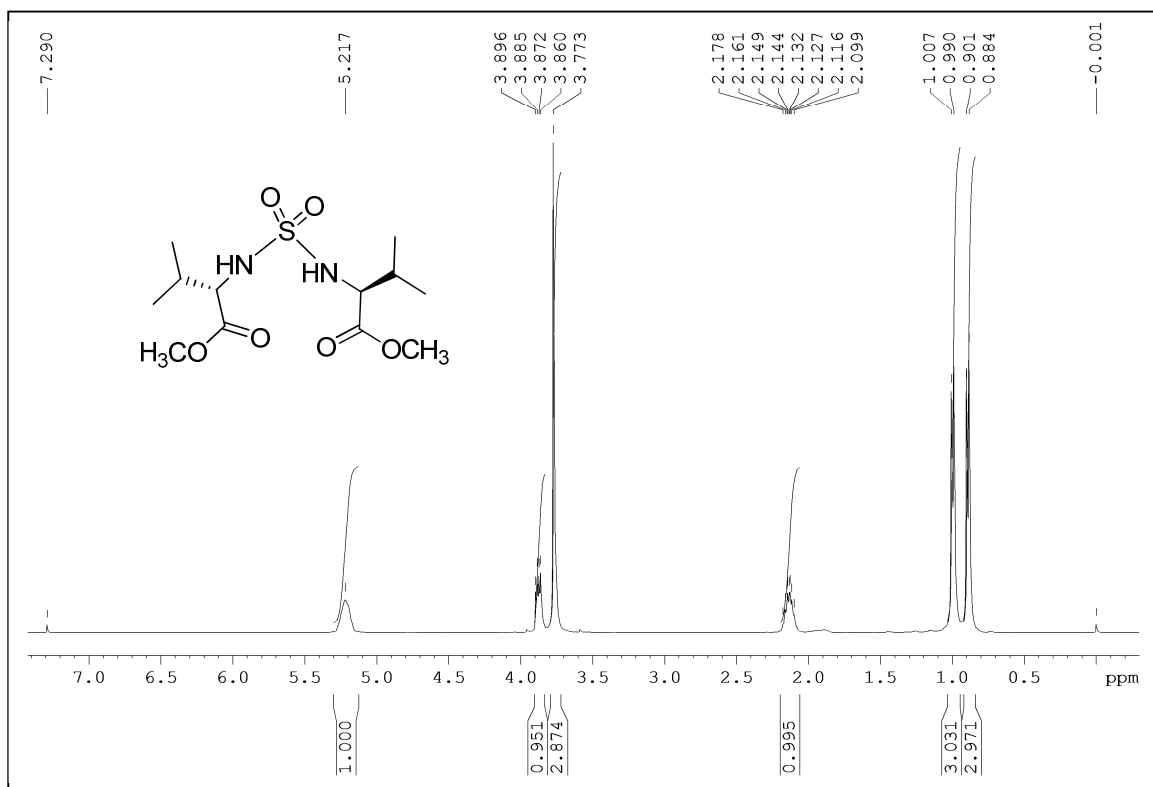

Figure 5.  $^1\text{H}$  NMR (400 MHz) spectrum of compound 2b

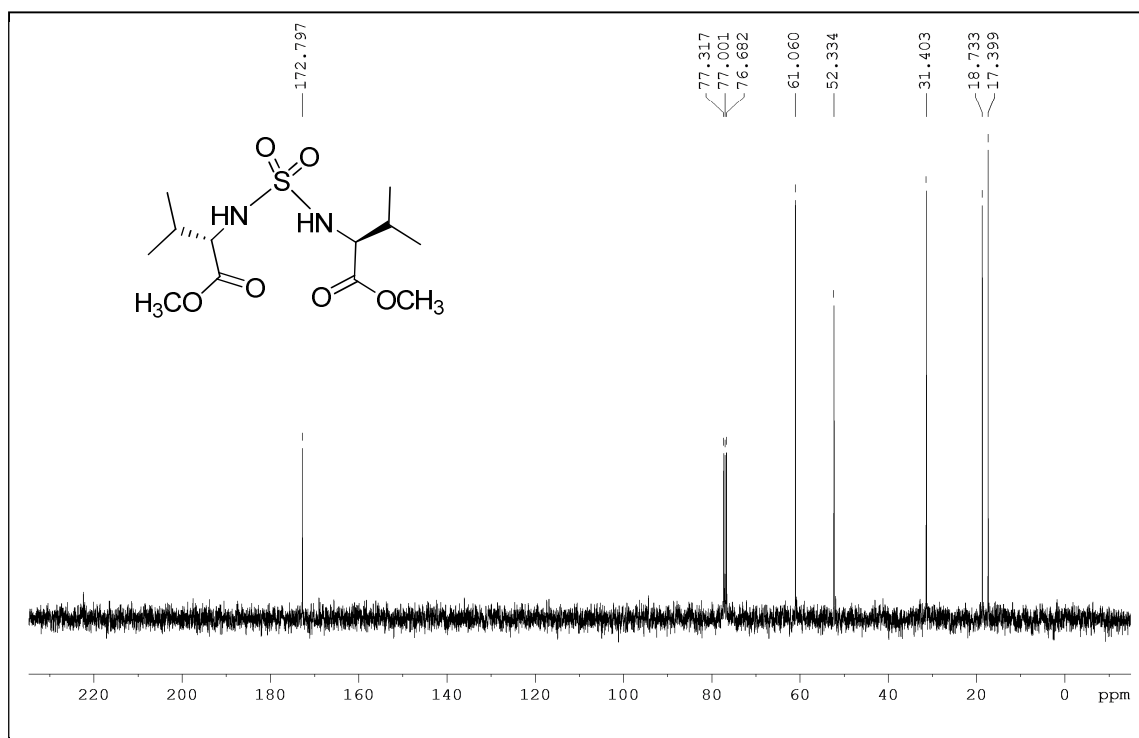

Figure 6.  $^{13}\text{C}$  NMR (100 MHz) spectrum of compound 2b

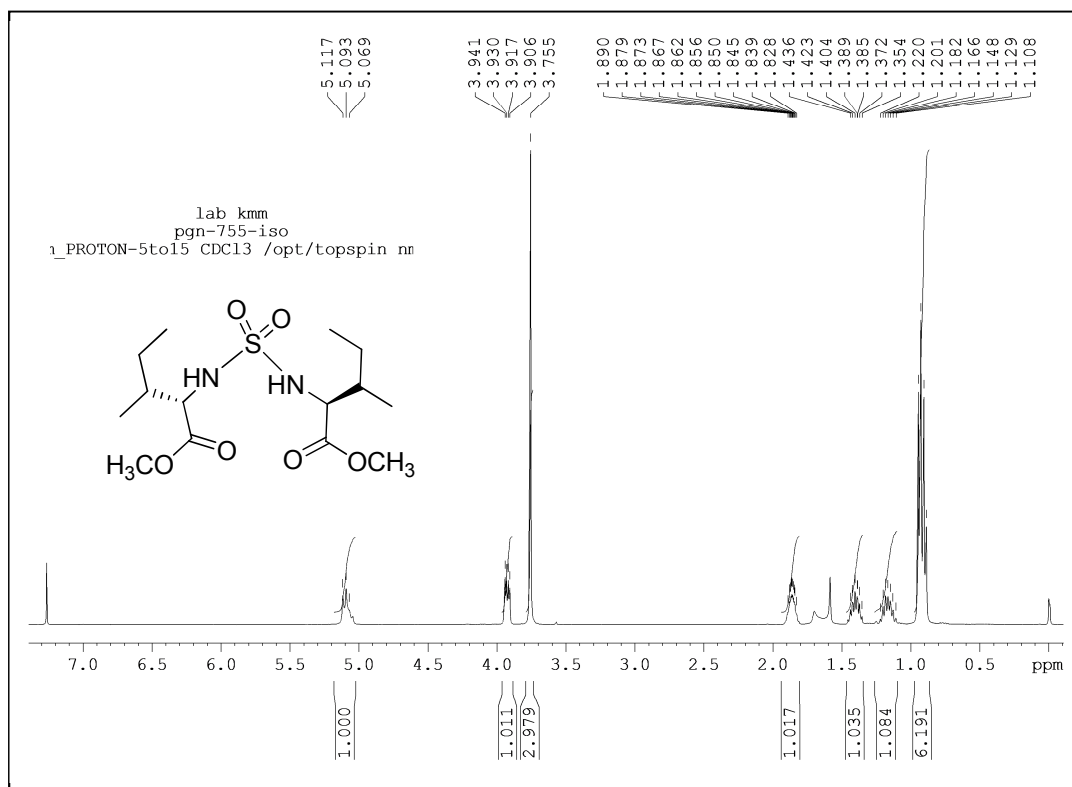

Figure 7.  $^1\text{H}$  NMR (400 MHz) spectrum of compound 2c

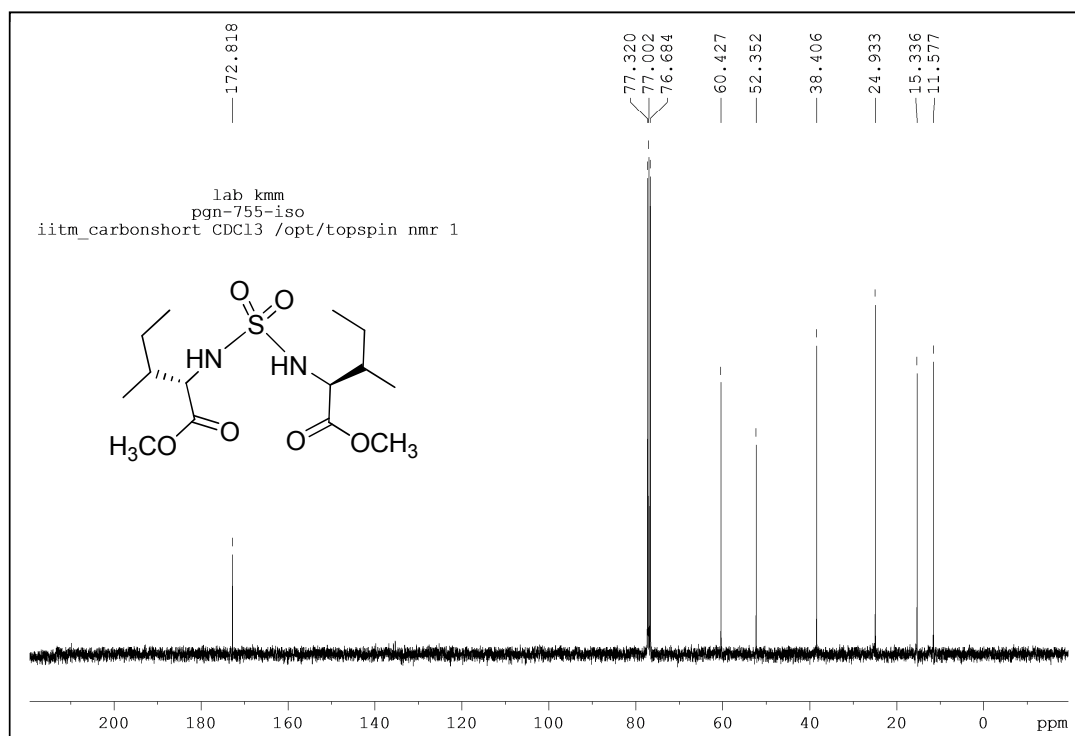

Figure 8.  $^{13}\text{C}$  NMR (100 MHz) spectrum of compound 2c

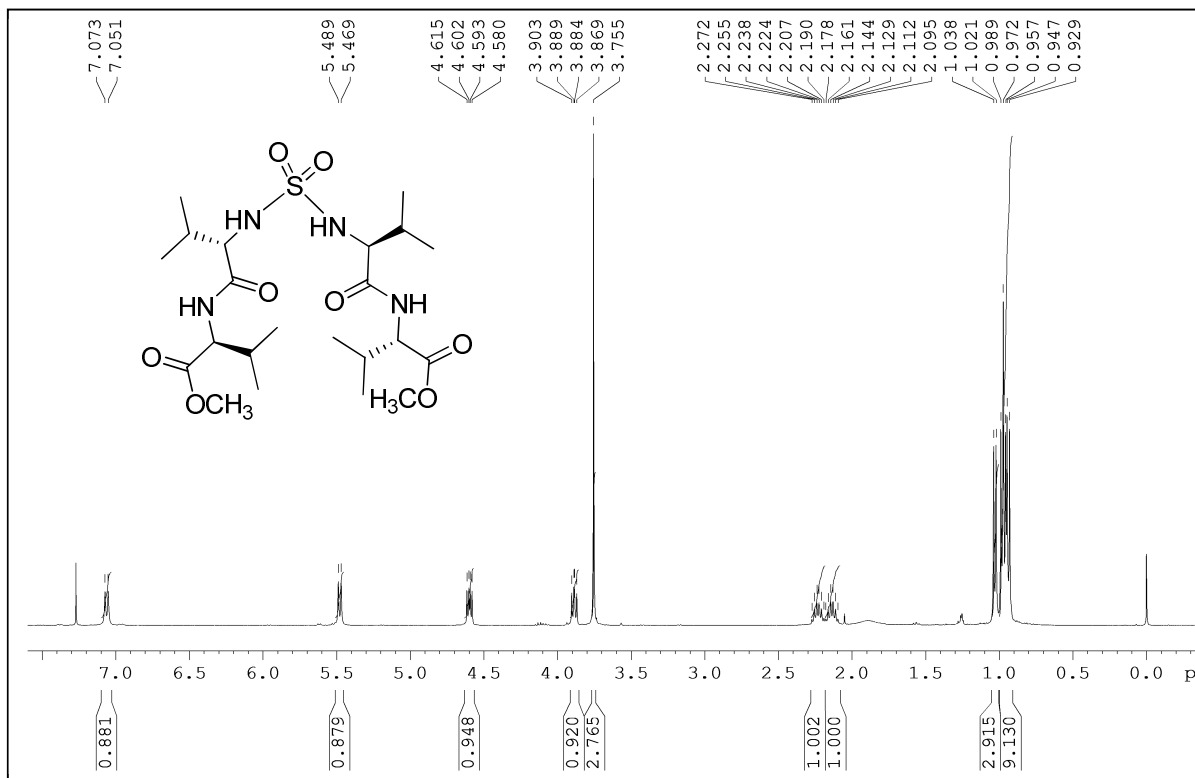

Figure 9. <sup>1</sup>H NMR (400 MHz) spectrum of compound 1a

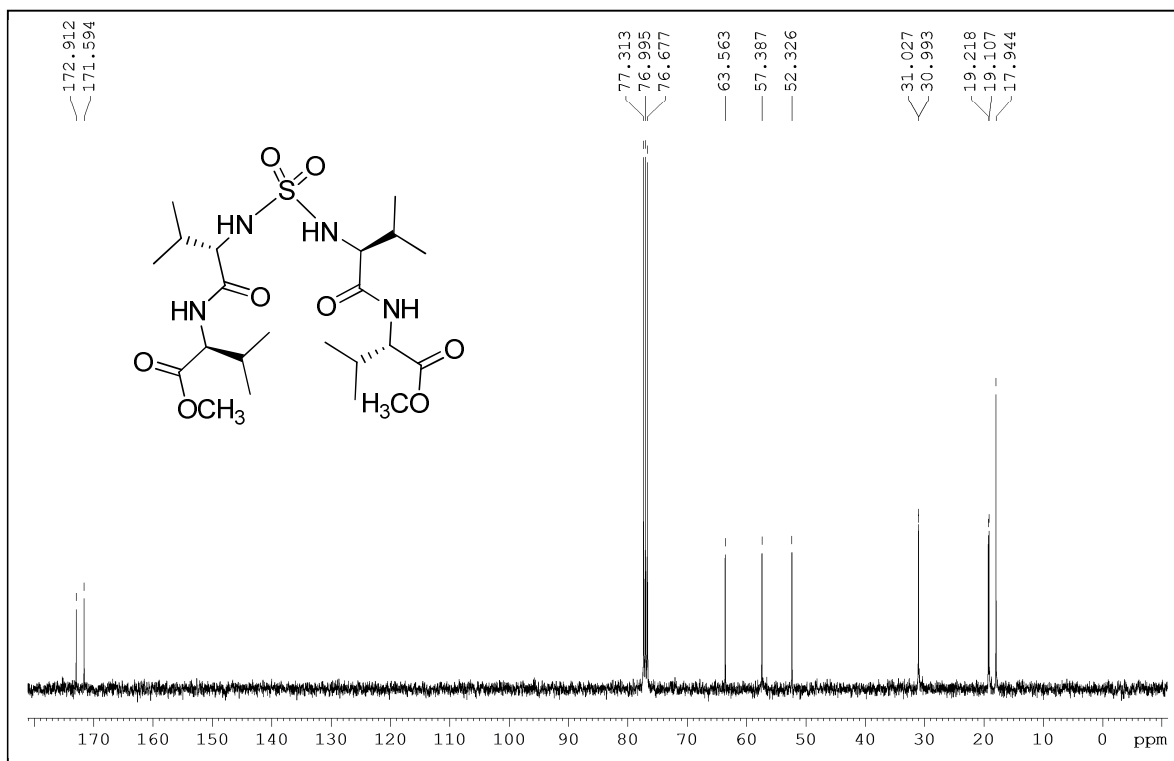

Figure 10. <sup>13</sup>C NMR (100 MHz) spectrum of compound 1a

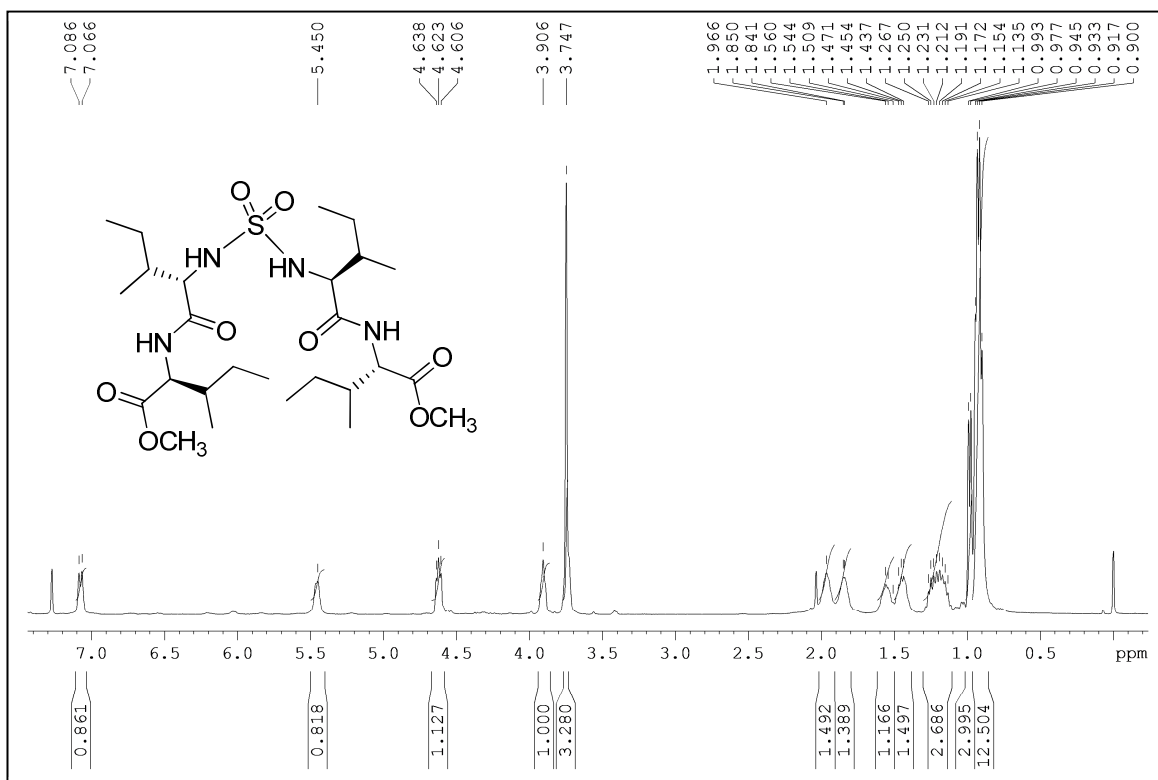

Figure 11. <sup>1</sup>H NMR (400 MHz) spectrum of compound 1b

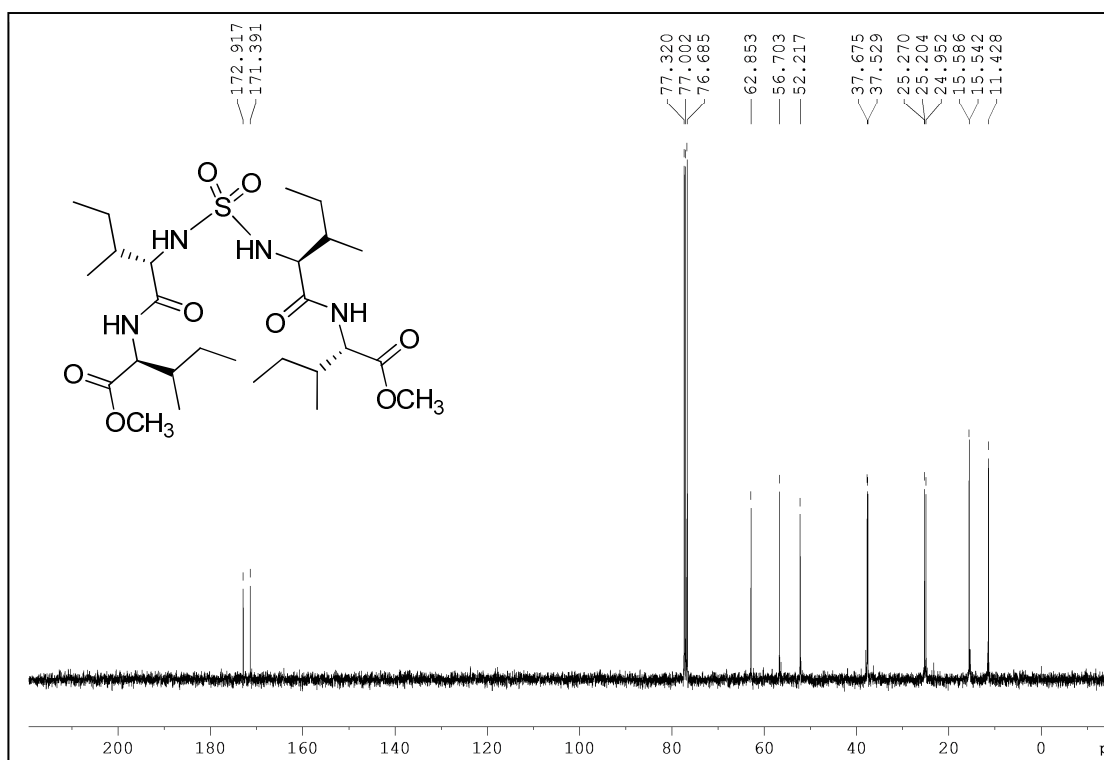

Figure 12. <sup>13</sup>C NMR (100 MHz) spectrum of compound 1b

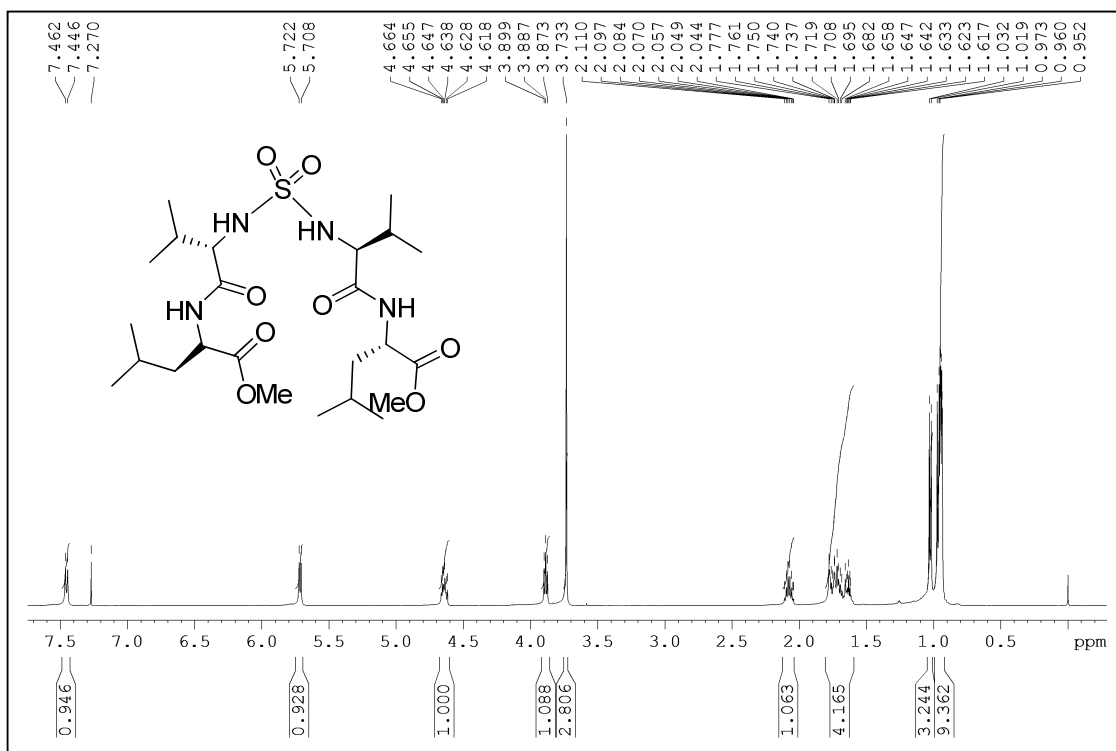

Figure 13.  $^1\text{H}$  NMR (400 MHz) spectrum of compound 1c

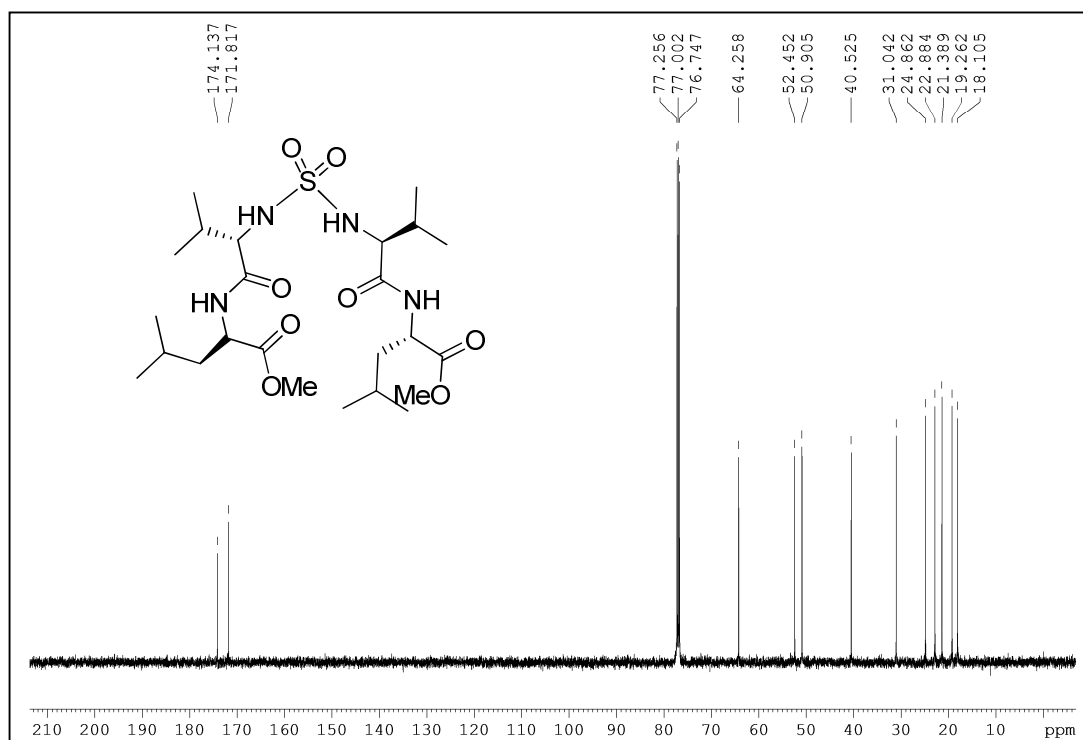

Figure 14.  $^{13}\text{C}$  NMR (100 MHz) spectrum of compound 1c



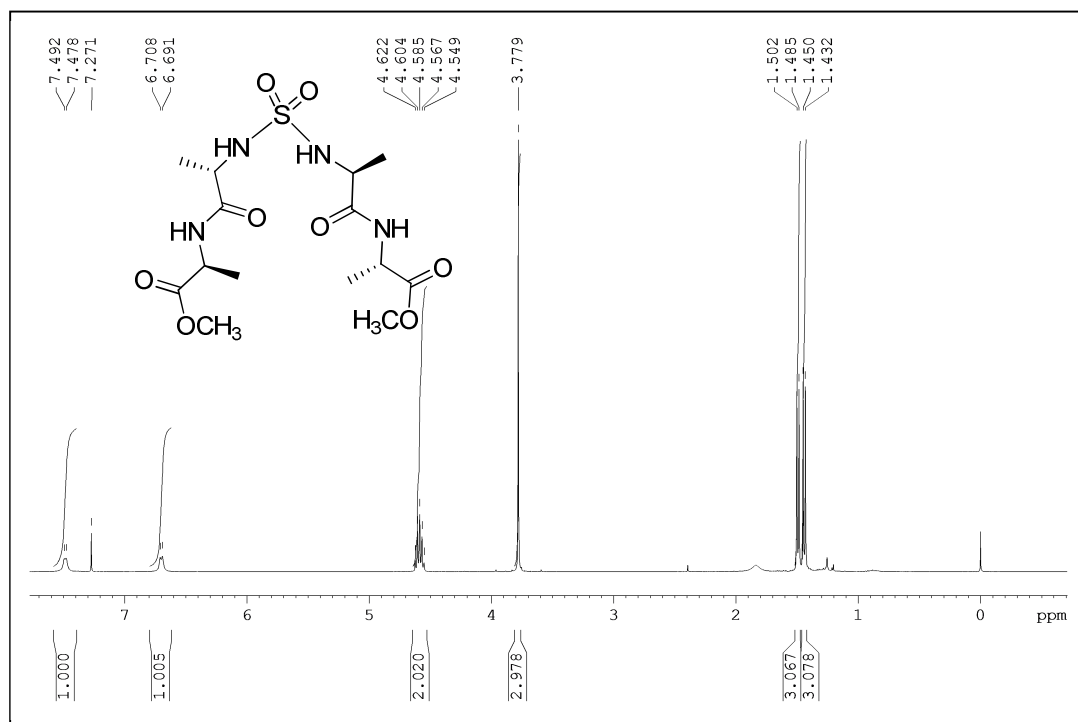

Figure 15. <sup>1</sup>H NMR (400 MHz) spectrum of compound 1d

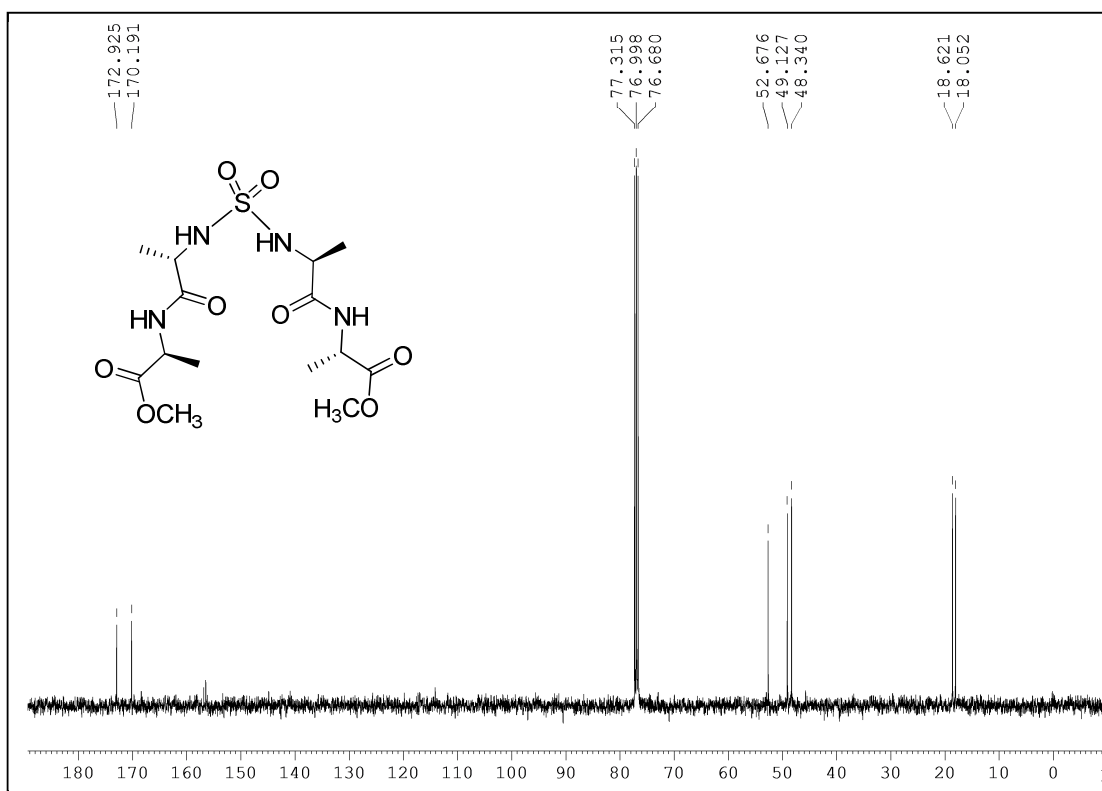

Figure 16. <sup>13</sup>C NMR (100 MHz) spectrum of compound 1d
